# Supplementary material for: Graphene oxide-mediated formation of freestanding, thickness controllable metal oxide films
Source: Royal Society of Chemistry journal article supplement (doi:10.1039/c1jm12159f), 2011-01-01
Supplement: c1jm12159f.pdf [file c1jm12159f.pdf]

## Supporting Information

Graphene oxide-mediated formation of freestanding and thickness controllable metal  
oxide films

Chao Xu, Zhixin Chen, Xianzhi Fu

Research Institute of Photocatalysis, State Key Laboratory Breeding Base of  
Photocatalysis, Fuzhou University, Fuzhou 350002, People's Republic of China

The formation processes of  $\text{Fe}_2\text{O}_3$  particles (1-4):

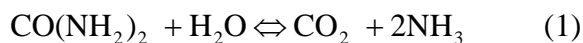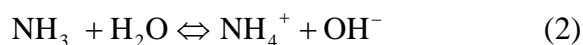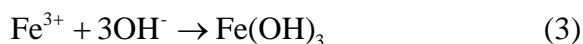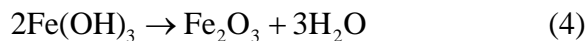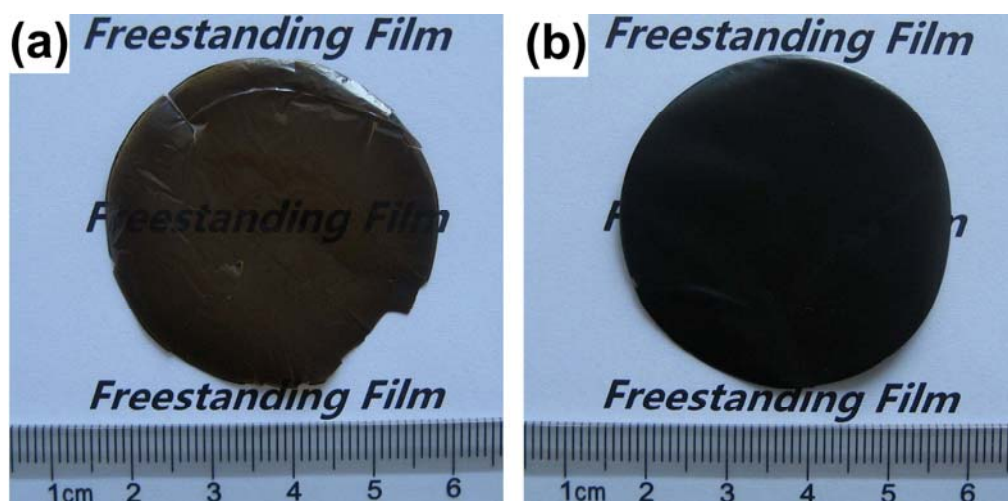

Fig. 1S Digital photos of freestanding composite films with different usage of  
GO- $\text{Fe}(\text{OH})_3$  composites. (a) 1.0 mL; (b) 5.0 mL (1 mg/mL of GO)

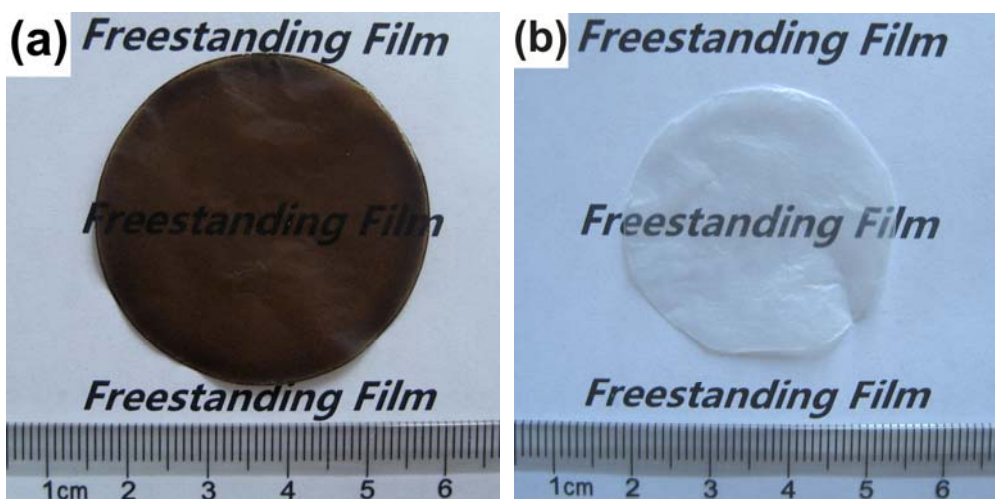

Figure 2S Digital photos of freestanding  $\text{TiO}_2$  films before and after calcination, the usage of GO- $\text{TiO}_2$  precursor composites is 2.5 mL (1 mg/mL of GO).

GO- $\text{Ti}(\text{OH})_4$  was prepared by hydrolyzing  $\text{Ti}(\text{SO}_4)_2$  in the presence of GO. And the as-prepared composite sheets were assembled into freestanding films by filtration, following by peeled off from the filter after dried. The composite films were calcined in air from 50 to 500 °C at a heating rate of 1 °C /min, and tempered at 500 °C for 2 h. After cooling to room temperature, the freestanding  $\text{TiO}_2$  films were obtained.

Table 1S. The contents of carbon, oxygen and ferrum of samples obtained by XPS analysis

| samples                      | C (wt %) | O (wt %) | Fe (wt %) |
|------------------------------|----------|----------|-----------|
| GO- $\text{Fe}(\text{OH})_3$ | 38.52    | 37.64    | 23.84     |
| $\text{Fe}_2\text{O}_3$      | 11.6     | 34.37    | 54.03     |

The higher contents of carbon, especially in  $\text{Fe}_2\text{O}_3$  film, may derive from the conductive tapes which were utilized to fix these transparent thin films.
